# Supplementary material for: The comparison of short-term prognostic value of T1 mapping with feature tracking by cardiovascular magnetic resonance in patients with severe dilated cardiomyopathy
Source: Springer Nature journal article supplement (doi:10.1007/s10554-018-1444-8), 2018-08-21
Supplement: MOESM1 [file 16061678]

Supplementary Materials

***Reproducibility***

The parameters derived by T1 mapping and feature tracking cardiovascular magnetic resonance (FT-CMR) were tested the reproducibility in five healthy controls and 10 randomly selected patients. For intraobserver reproducibility, the first experienced observer was blinded to the clinical information and follow-up information; we then sketched regions of interest (ROIs) in T1 mapping and FT-CMR analysis twice at 2-week intervals. For interobserver reproducibility, another experienced observer did the same thing in the selected participants.

For reproducibility, agreement was tested by calculating the mean bias and 95% limits of agreement using a Bland–Altman test, coefficient of variation, and interclass correlation coefficient (ICC). Only Global Radial Strain (GRS) had been excluded from the analysis. Although the ICC of GRS is greater than 0.75, there were two reasons we had to exclude GRS: (1) the bias of 95% limits of agreement shown on a Bland-Altman test was high (-33.5, 28.9); (2) Claus et al [[1](#_ENREF_1)] demonstrated that radial strain shows large ranges between studies, which restrict their use as single clinical measures.

***Multivariate Cox regression models***

NT-proBNP is recognized as a powerful prognostic marker in cardiomyopathy, and an additional adjusted model was built. Since NT-proBNP data were missing for three patients, this model only considered data from 43 patients.

***Cross-validation***

Cross-validation was used to evaluate the performance of classification algorithms, which we generally refer to as K-fold cross-validation. In this scheme, the data are usually divided into K partitions. Each partition is rotated to be the test set and the rest are used as the training data. To evaluate the accuracy of the performance of classification algorithms, the average accuracies of the K tests is used.

***Leave-one-out Cross-validation***

Leave-one-out cross-validation is a special case of K-fold cross-validation in which the number of folds equals sample size N. Next, (N-1) partitions of data are used as the training set, while the remainder is used as the test set. This analysis is suitable for evaluating the performance of the model containing a relatively small sample size. In our study, we used (N-1) patients’ data to fit the Cox model to predict the survival probability at each time of the other patient.

***Time-Dependent ROC Curves***

Time-dependent ROC curves vary as a function of time, which is used for many time-dependent disease outcomes. There are two approaches to the estimation of time-dependent ROC curves. The first approach is based on the Kaplan-Meier estimator (Kaplan and Meier, 1958), while another is nearest neighbor estimation. When the Kaplan-Meier estimator leads to non-monotone sensitivity and specificity functions, the nearest neighbor estimation method must be used.

***Nearest Neighbor Estimation***

The advantages of nearest neighbor estimation are that it is monotone and relatively highly depend on the diagnostic marker X.

The formula used to estimate in the nearest neighbor estimation is as follows:


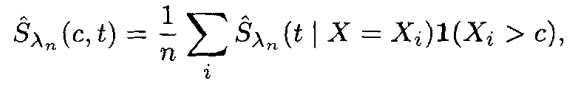


where X represents the diagnostic markers, T represents the survival time, and the estimator of the bivariate distribution function is S(c,t) = P(X > c, T > t). Furthermore, λn represents the smoothing parameter called span, in which the span has no agreement with the optimal choice[[2-4](#_ENREF_2)].

**References**

1. Claus P, Omar AM, Pedrizzetti G, et al. Tissue Tracking Technology for Assessing Cardiac Mechanics: Principles, Normal Values, and Clinical Applications. JACC. Cardiovascular imaging 2015; **8**(12): 1444-60.

2. Patrick J. Heagerty TL, Margaret S. Pepe. Time-Dependent ROC Curves for Censored Survival Data and a Diagnostic Marker. BIOMETRI 2000; **56**: 337-44.

3. Blanche P, Dartigues JF,Jacqmin-Gadda H. Review and comparison of ROC curve estimators for a time-dependent outcome with marker-dependent censoring. Biometrical journal. Biometrische Zeitschrift 2013; **55**(5): 687-704.

4. Liang Li BH, and Tom Greene. A Simple Method to Estimate the Time-dependent ROC Curve Under Right Censoring. Collection of Biostatistics Research Archive COBRA Preprint Series 2015; **114**.

**List of Table and Figure**

**Image Analysis**

Figure 1: Region of interest of midventricular short-axis T1 maps

Figure 2: Region of interest of FT-CMR at long-axis

Figure 3: Region of interest of FT-CMR at short-axis

**Reproducibility**

Table 1: Feature Tracking, interobserver and intraobserver coefficient of variation and interclass correlation coefficient

Figure 4: Reproducibility of T1 mapping parameters

Figure 5: Reproducibility of Feature Tracking parameters

Figure 6: Reproducibility of Feature Tracking parameters

**Time dependent receiver operating characteristic analysis**

Figure 7: Time dependent receiver operating characteristic analysis for Model1

Table 2: Results of Multivariable Analyses of Cardiovascular Events adjusted with NT.proBNP

Figure 8: Time dependent receiver operating characteristic analysis for Model2

**Correlation**

Figure 9: Correlation between left ventricular ejection fraction and other parameters

Figure 10: Correlation between left ventricular end-diastolic volume index and other parameters

Figure 11: Correlation between T1 mapping and strain parameters


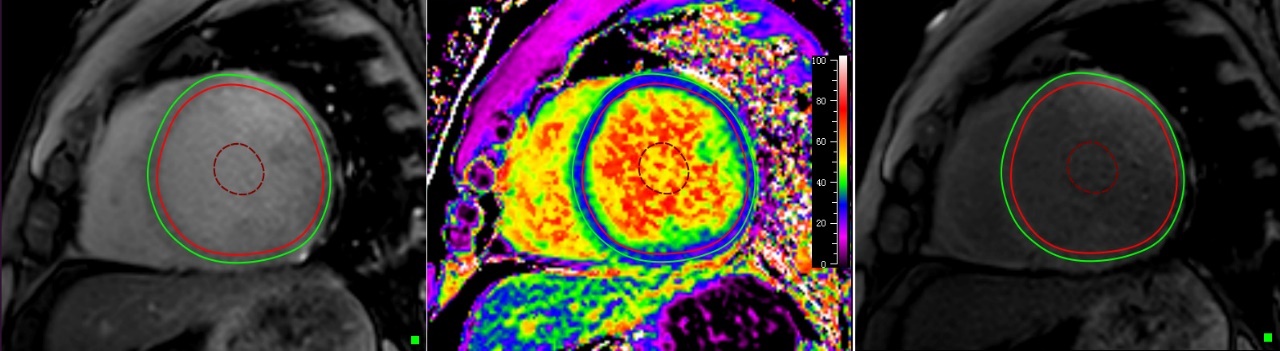


Figure 1. Region of interest of midventricular short-axis T1 maps. Left to right: pre-contrast, ECV map, and post-contrast.


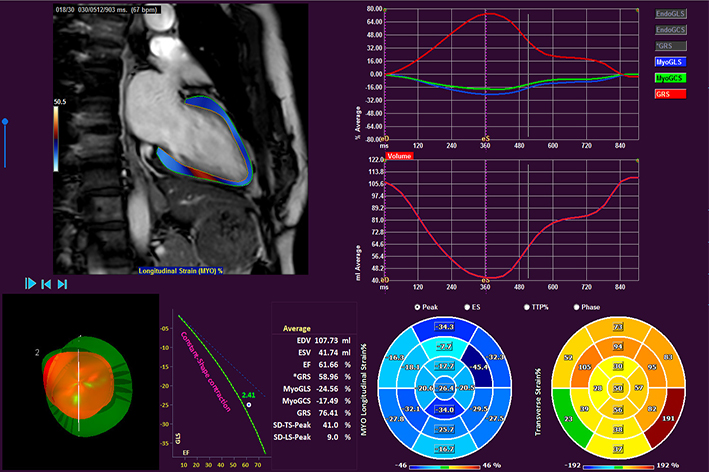


Figure 2. Region of interest of FT-CMR at long-axis. A two-chamber view of a normal control with normal longitudinal strain was shown.


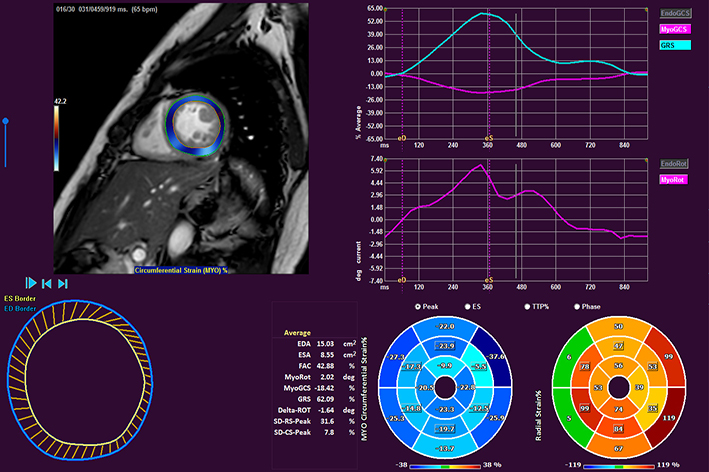


Figure 3. Region of interest of FT-CMR at short-axis. A short-axis view of a normal control with normal longitudinal strain at mid-ventricular was shown.

**Table 1 Feature Tracking, interobserver and intraobserver coefficient of variation and interclass correlation coefficient**

|  | Intraobserver Variability | | | Interobserver Variability | | |
| --- | --- | --- | --- | --- | --- | --- |
| Mean difference | Limit agreement | ICC | Mean difference | Limit agreement | ICC |
| GLS | 0.28 ± 1.29 | -2.29, 2.86 | 0.989 | 0.13 ± 1.47 | -2.81, 3.06 | 0.987 |
| GCS | 0.33 ± 1.89 | -3.45, 4.11 | 0.974 | 0.19 ± 2.23 | -4.27, 4.64 | 0.966 |
| GRS | -2.28 ± 15.59 | -33.5, 28.9 | 0.881 | -6.27 ± 13.6 | -33.3, 20.7 | 0.916 |
| ECV | -0.23 ± 0.63 | -1.49, 1.03 | 0.992 | -0.27 ± 0.86 | -2.01, 1.44 | 0.986 |
| Native T1 | -1.80 ± 15.79 | -33.8, 29.8 | 0.975 | -0.47 ± 16.0 | -32.5, 31.6 | 0.973 |
| Post T1 | 3.63 ± 6.25 | -8.86, 16.13 | 0.996 | 3.70 ± 8.72 | -13.7, 21.1 | 0.991 |

ICC, inter-class correlation coefficient; GLS, global longitudinal strain; GCS, global circumferential strain; GRS, global radial strain; ECV, extracellular volume fraction


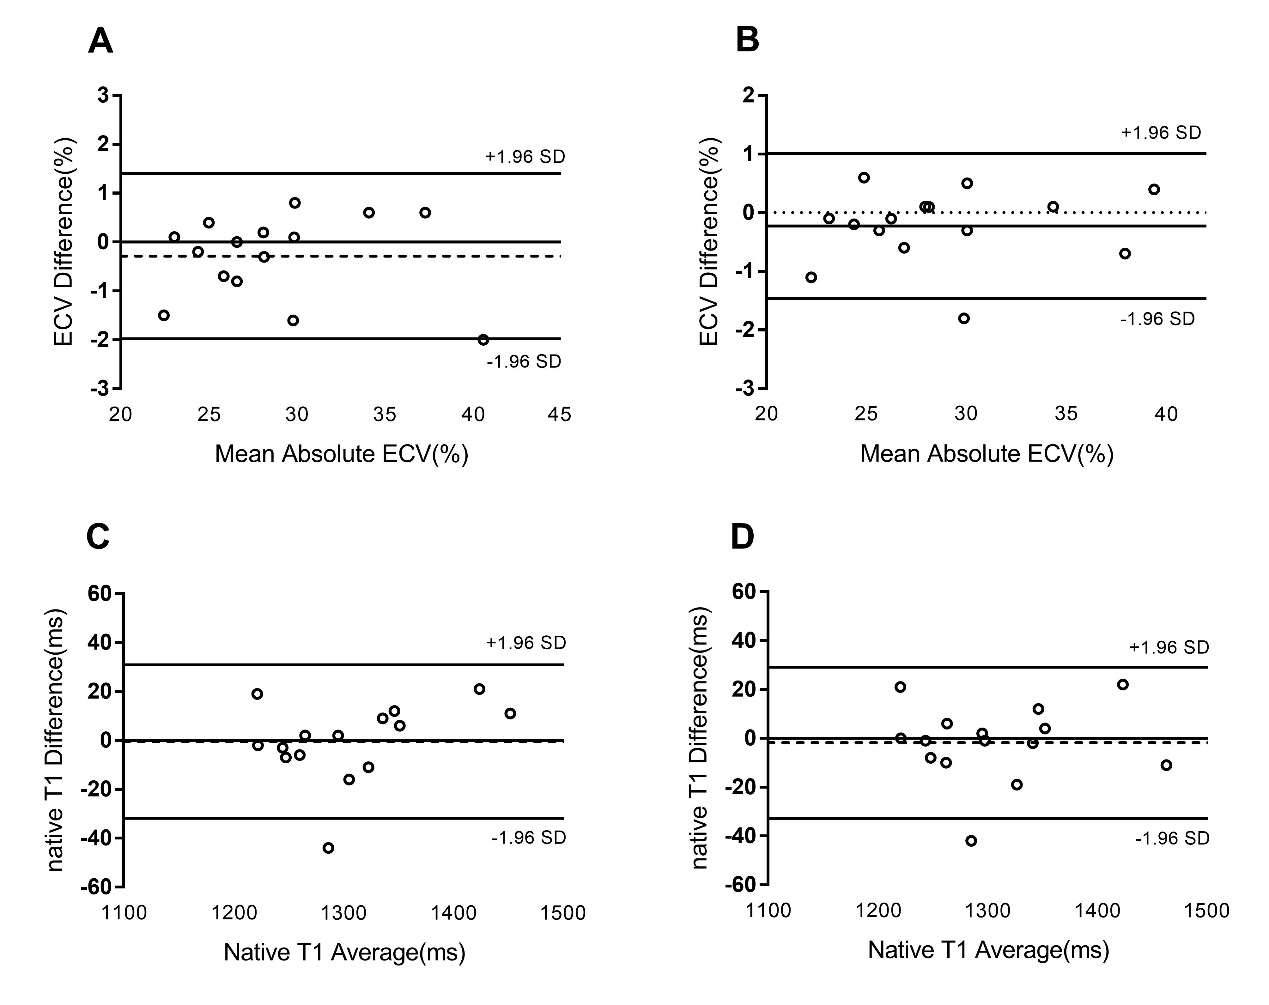


Figure 4. Reproducibility of T1 mapping parameters (Interobserver and intraobserver of ECV (Extracellular Volume Fraction) were shown at A and B, native T1 shown at C and D)


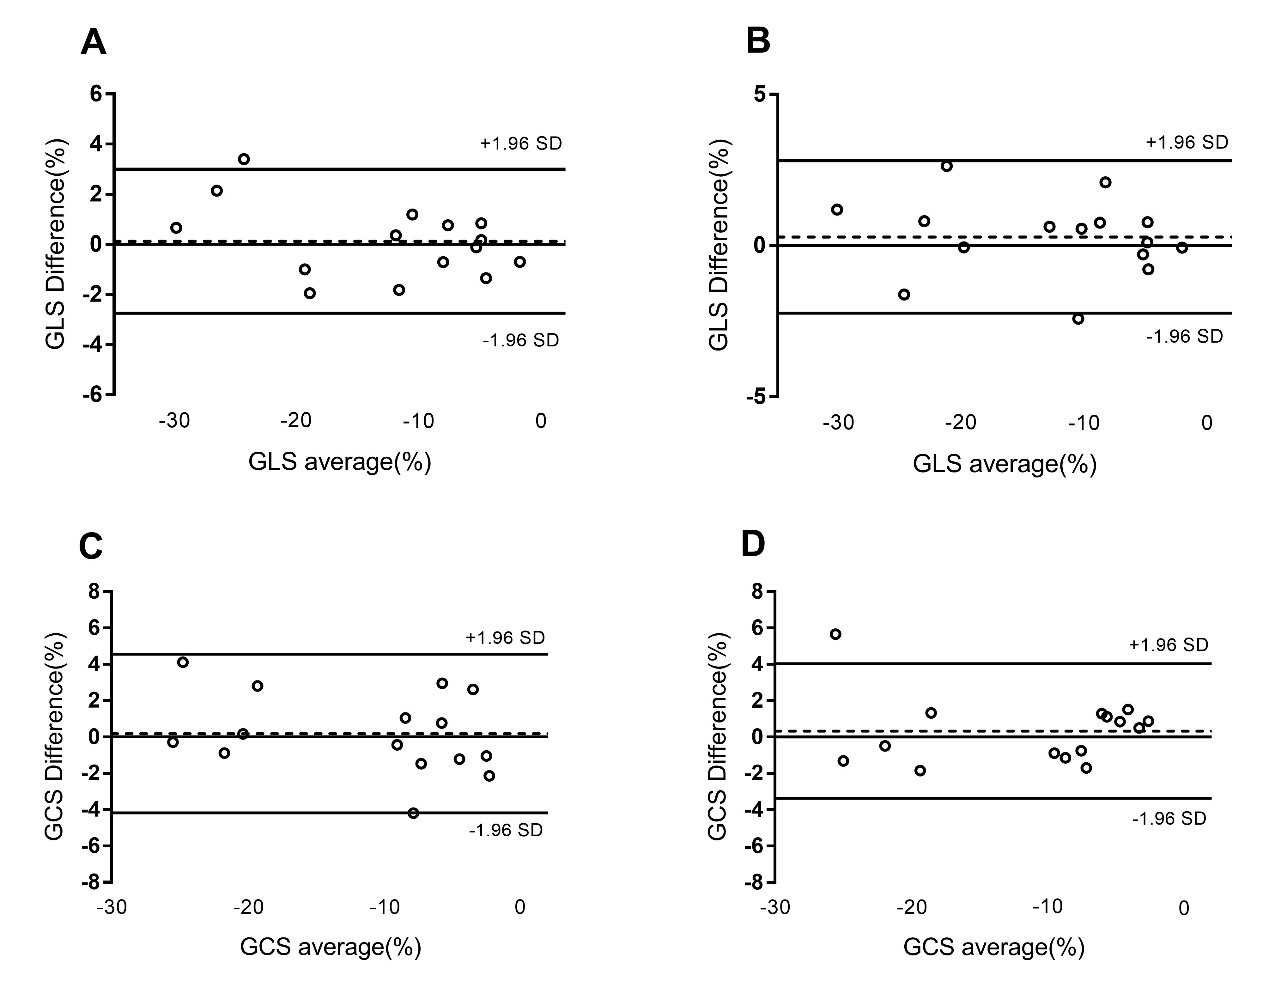


Figure 5. Reproducibility of Feature Tracking parameters (Interobserver and intraobserver of GLS were shown at A and B, GCS shown at C and D)

GLS, global longitudinal strain; GCS, global circumferential strain


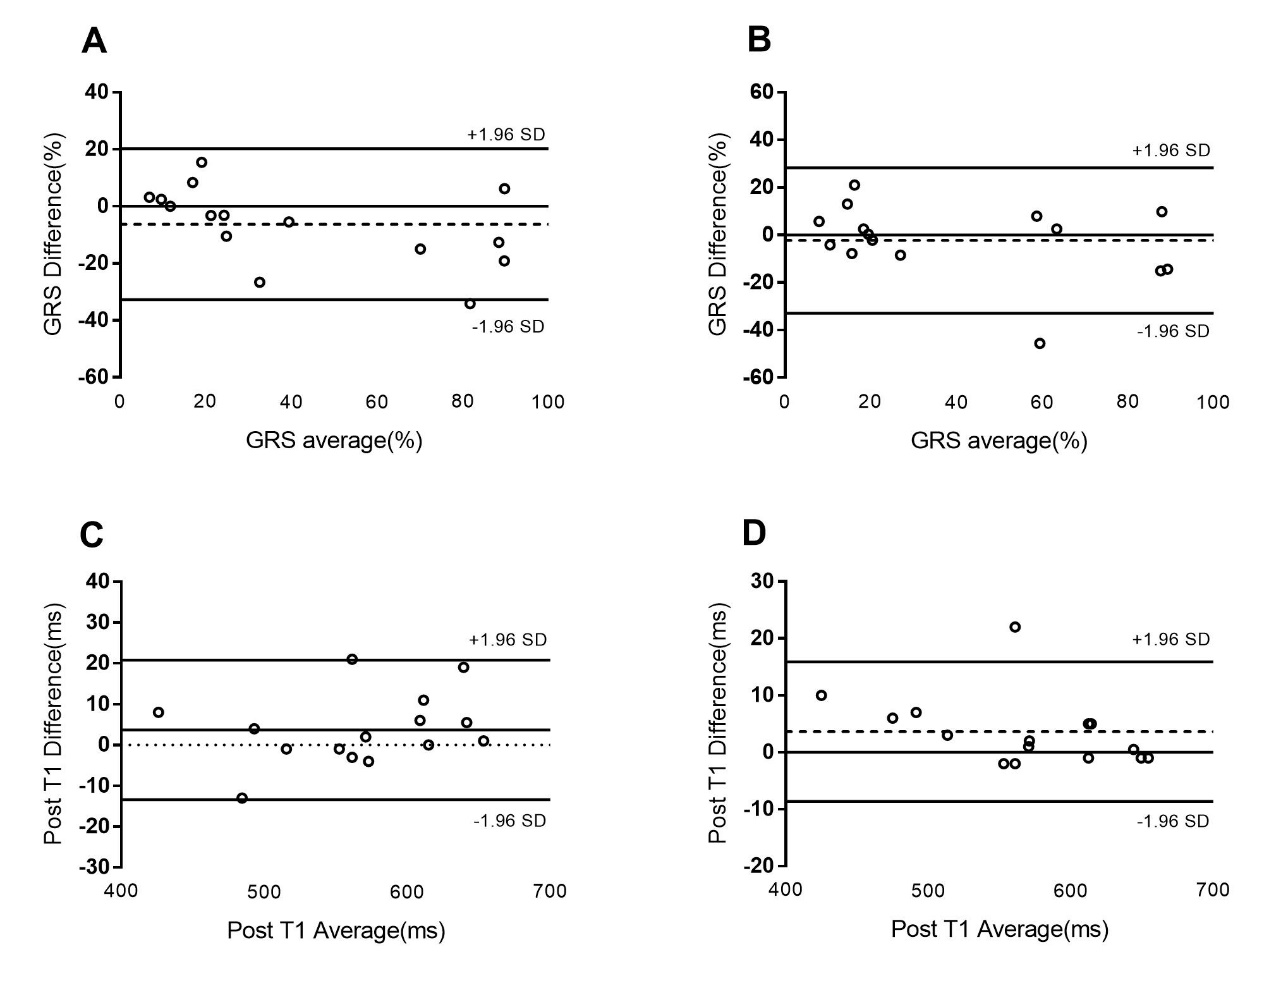


Figure 6. Reproducibility of Feature Tracking parameters (Interobserver and intraobserver of GRS were shown at A and B, Post T1 shown at C and D)

GRS, global radial strain


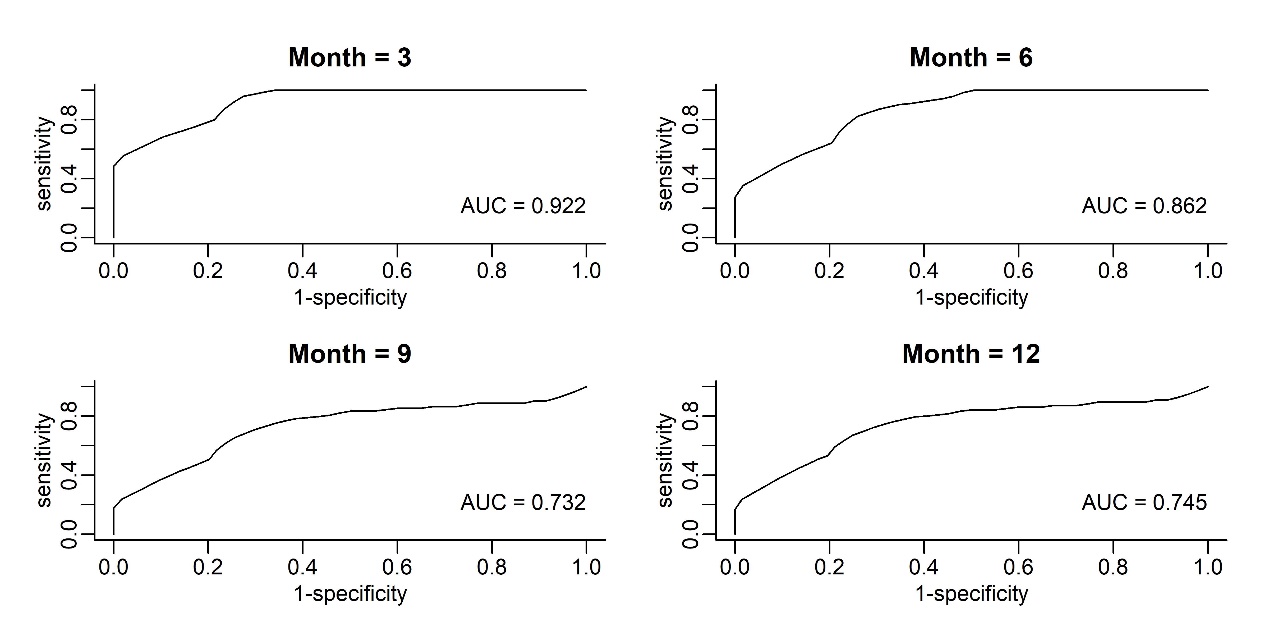


Figure 7. Time dependent receiver operating characteristic analysis for Model1 (Time-dependent receiver ROC were performed to further evaluate and confirm the predictive performance of the multivariate cox regression models with the leave-one-out cross validation). Variables in Model1 (all patients): Gender, creatine, Systolic Blood Pressure, LVEDVI, ECV;

LVEDVI, left ventricular end diastolic volume index; LGE, late gadolinium enhancement; ECV, extracellular volume fraction

**Table 2 Results of Multivariable Analyses of Cardiovascular Events adjusted with NT.proBNP**

|  | Model2  (43 patients) | | |
| --- | --- | --- | --- |
| Hazard ratio | 95% CI | P value |
| Gender (male) | 0.53 | 0.07, 3.92 | 0.530 |
| LVEDVI  (mL/m2×10) | 1.10 | 0.94, 1.30 | 0.249 |
| ECV (%) | 1.33 | 1.08, 1.65 | **0.008** |
| LGE extent  (%) | 0.97 | 0.85, 1.11 | 0.660 |
| NT.proBNP  （pg/mL×100） | 1.00 | 0.98, 1.03 | 0.837 |
| Log rank P<0.01 | | | |

Multivariate analysis results were presented with hazard ratios (HR) with 95% confidence intervals (CI). Values in bold indicate significance.

LVEDVI, left ventricular end diastolic volume index; ECV, extracellular volume fraction


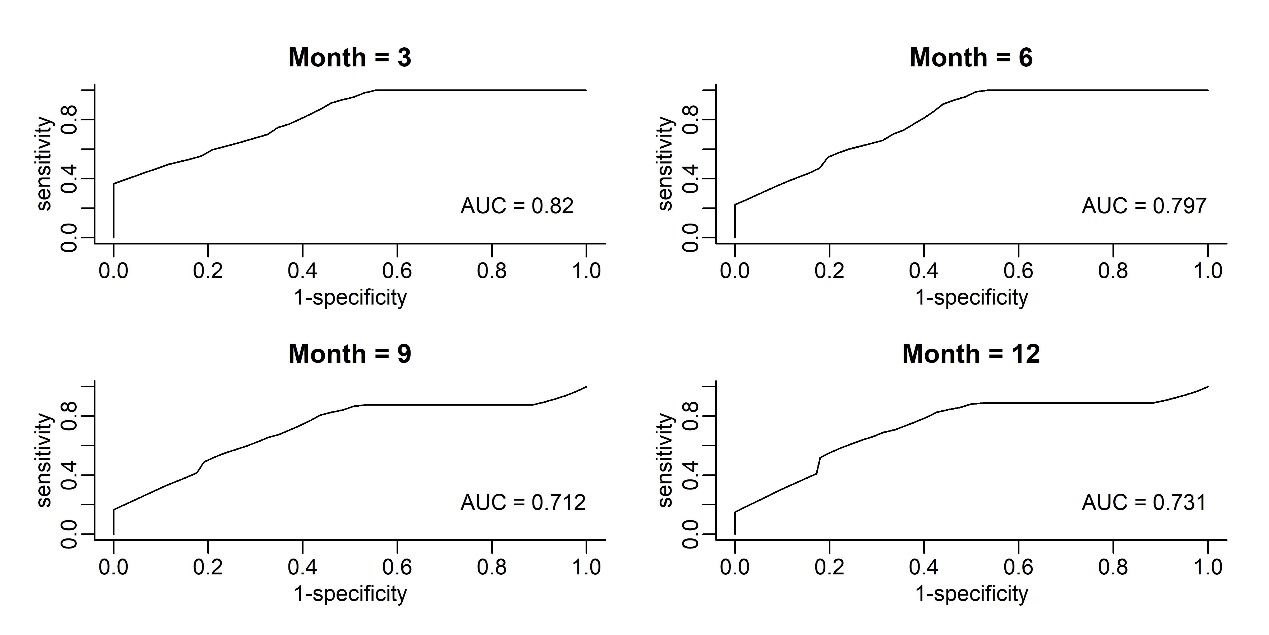


Figure 8. Time dependent receiver operating characteristic analysis for Model2. Variables in Model2 (43 patients): gender, NT-proBNP, , LVEDVI, ,LGE extent, ECV

LVEDVI, left ventricular end diastolic volume index; LGE, late gadolinium enhancement; ECV, extracellular volume fraction


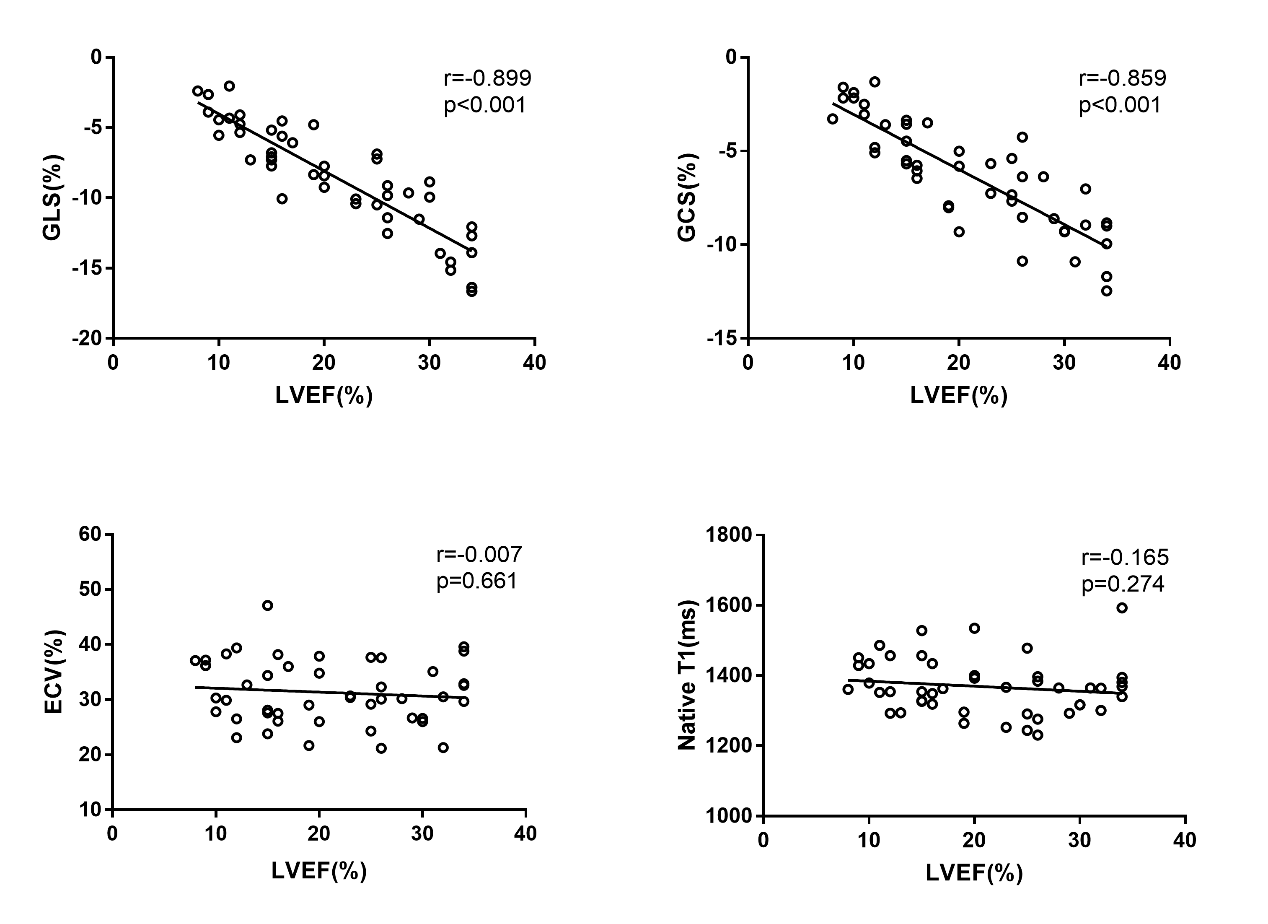


Figure 9. Correlation between left ventricular ejection fraction and other parameters

LVEF, left ventricular ejection fraction; GLS, global longitudinal strain; GCS, global circumferential strain; ECV, extracellular volume fraction


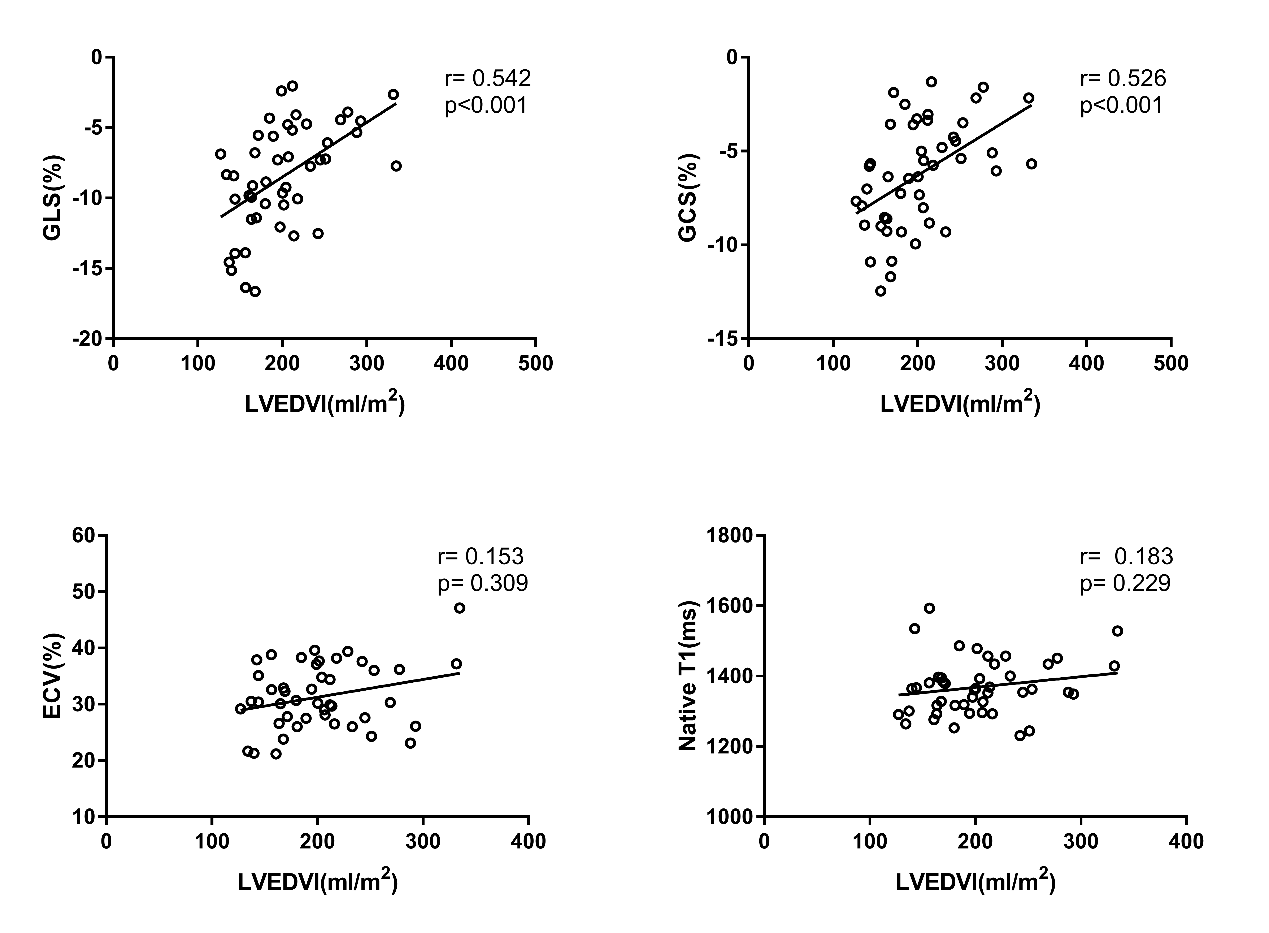


Figure 10. Correlation between left ventricular end-diastolic volume index and other parameters

LVEDVI, left ventricular end diastolic volume index; GLS, global longitudinal strain; GCS, global circumferential strain; ECV, extracellular volume fraction


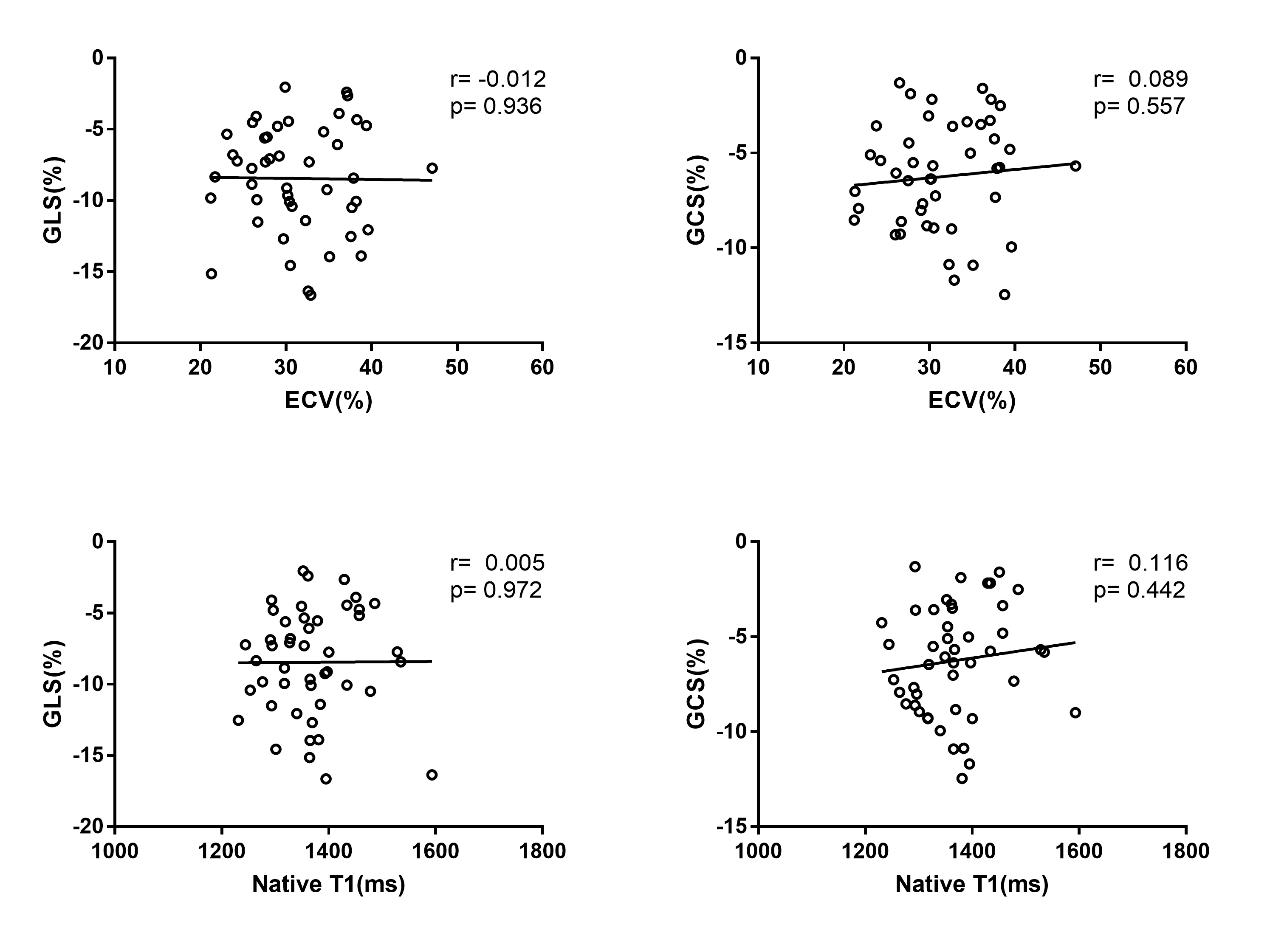


Figure 11. Correlation between T1 mapping and strain parameters

GLS, global longitudinal strain; GCS, global circumferential strain; ECV, extracellular volume fraction
